# Supplementary material
Source: PubMed Central journal article supplement (PMC4725286)
Supplement: AEM.02382-15_zam999116876so1.pdf [file AEM.02382-15_zam999116876so1.pdf]

## Isolation of polyvalent bacteriophages using sequential multiple host approaches

Pingfeng Yu, Jacques Mathieu, Mengyan Li, Zhaoyi Dai and Pedro J.J. Alvarez

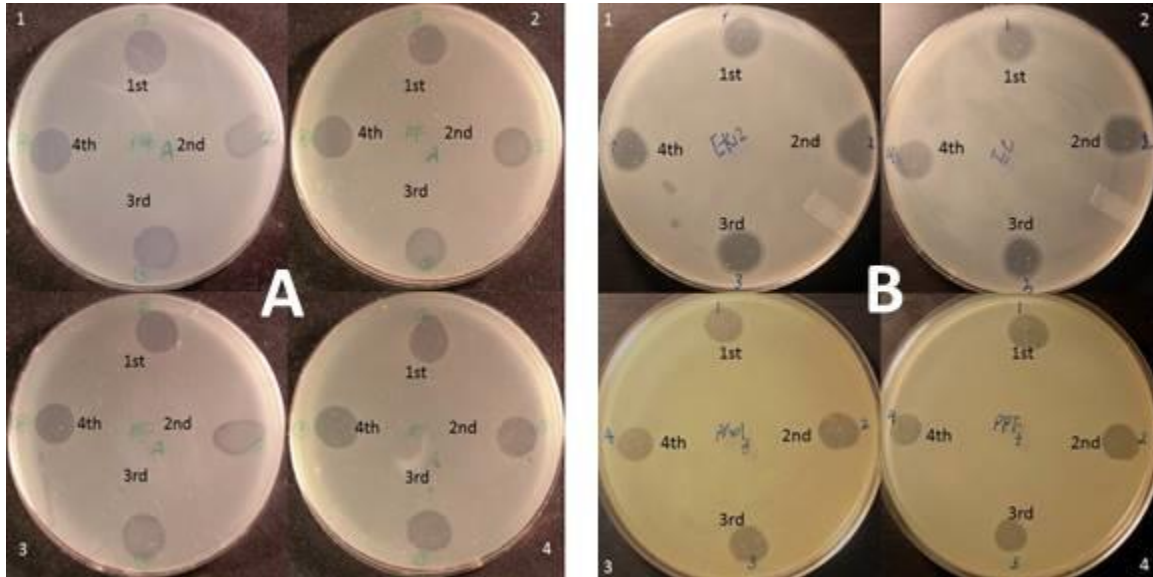

Figure S1 **Spot tests results of phage PX1(A) and PEF1(B)**. Phage PX1 and PEF1 formed clear lytic zones on the lawn of different hosts. (A1) *P. aeruginosa* PA01, (A2) *P. CF600*, (A3) *P. putida* F1, and (A4) *P. syringae* van Hall. (B1) *E. coli* K12 (with halo), (B2) *E. coli* C3000 (with halo), (B3) *P. aeruginosa* PA01, and (B4) *P. putida* F1. 1<sup>st</sup> stands for 1<sup>st</sup> generation of PX1, 2<sup>nd</sup> stands for 2<sup>nd</sup> generation of PX1, 3<sup>rd</sup> stands for 3<sup>rd</sup> generation of PX1, 4<sup>th</sup> stands for 4<sup>th</sup> generation of PX1.

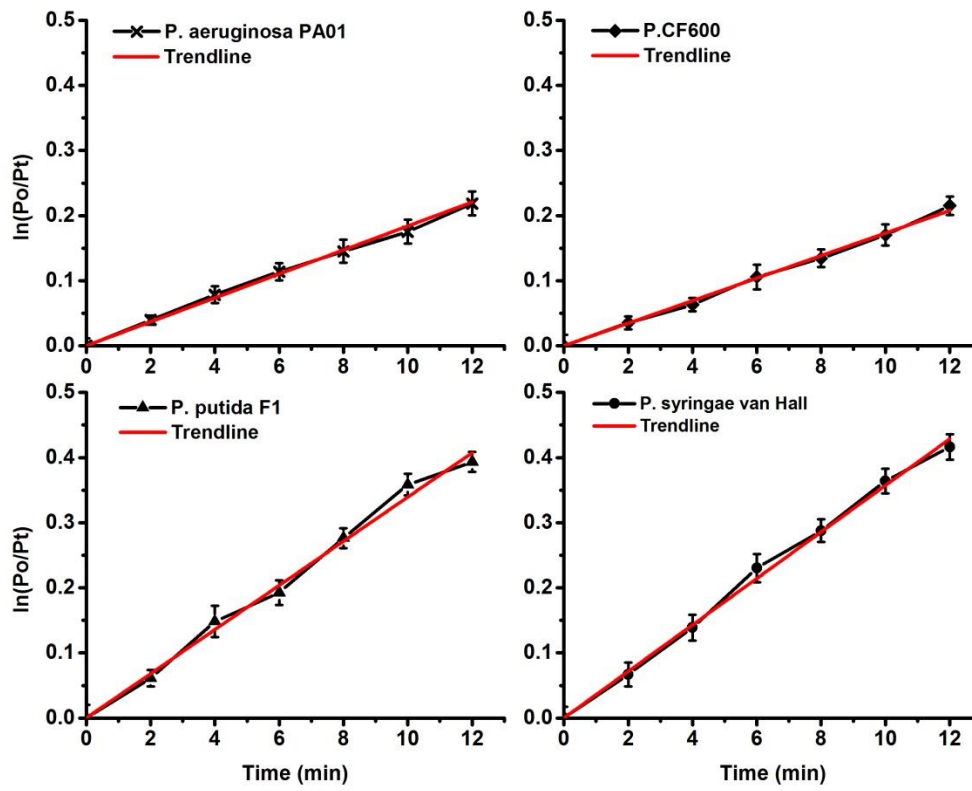

Figure S2. **The adsorption kinetics of phage PX1.**  $P_0$  is number of free phage at time 0, and  $P_t$  is number of free phage at time t. Trendline is the regression line. Slope and R2 values are listed in Table S1. Error bars indicate standard deviations from the mean of triplicate independent experiments.

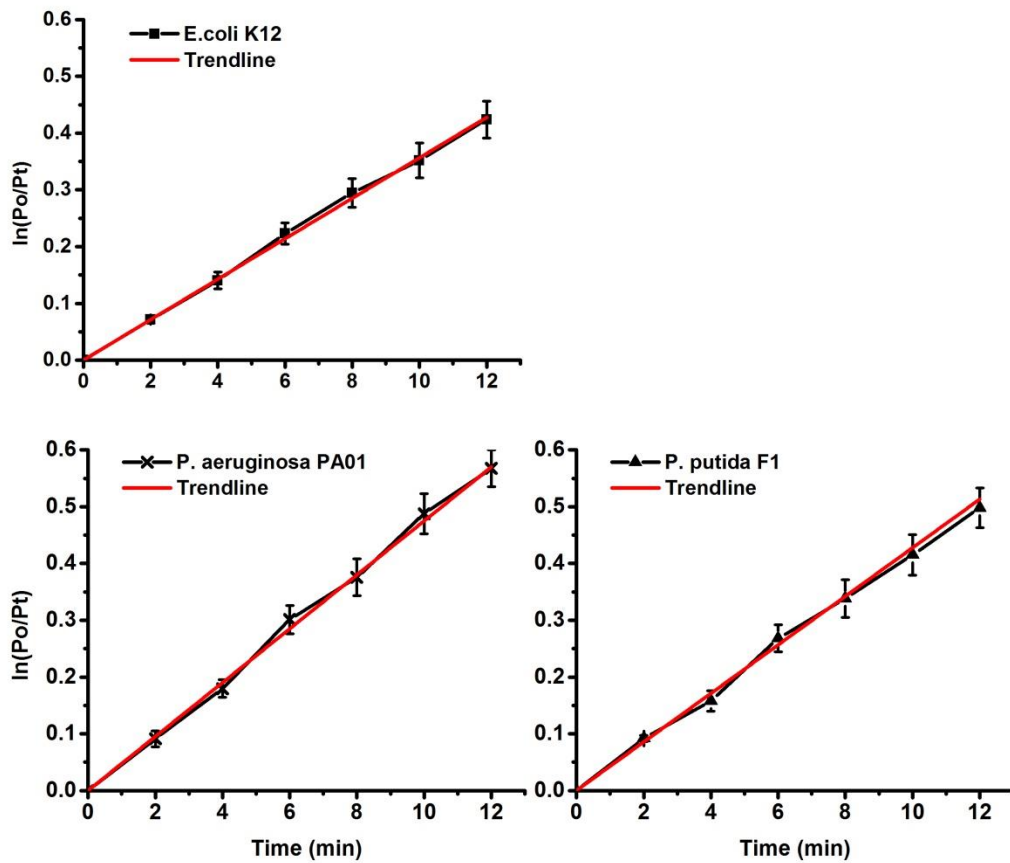

Figure S3. **The adsorption kinetics of phage Pef1.**  $P_0$  is number of free phage at time 0, and  $P_t$  is number of free phage at time t. Trendline is the regression line. Slope and  $R^2$  values are listed in Table S1. Error bars indicate standard deviations from the mean of triplicate independent experiments.

Table S1. Determination of phage adsorption rate constant <sup>a</sup>

| Phage | Host                        | Slope <sup>b</sup> | R <sup>2</sup> <sup>c</sup> | Host density(B)<br>10 <sup>8</sup> CFU/mL | Adsorption rate(k)<br>10 <sup>-10</sup> mL/min |
|-------|-----------------------------|--------------------|-----------------------------|-------------------------------------------|------------------------------------------------|
| PX1   | <i>P. aeruginosa</i> PA01   | 0.0182             | 0.998                       | 0.50                                      | 3.63                                           |
|       | <i>P. CF600</i>             | 0.0174             | 0.998                       | 0.49                                      | 3.54                                           |
|       | <i>P. putida</i> F1         | 0.0341             | 0.995                       | 0.58                                      | 5.88                                           |
|       | <i>P. syringae</i> van Hall | 0.0356             | 0.998                       | 0.61                                      | 5.83                                           |
| PEf1  | <i>P. aeruginosa</i> PA01   | 0.0478             | 0.998                       | 0.56                                      | 8.53                                           |
|       | <i>P. putida</i> F1         | 0.0415             | 0.998                       | 0.63                                      | 6.59                                           |
|       | <i>E. coli</i> K12          | 0.0358             | 0.998                       | 0.60                                      | 5.96                                           |

<sup>a</sup> Adsorption rate constant was calculated based on equation

$$kB = \frac{\ln(P_0) - \ln(P_t)}{t}$$

Where k is adsorption rate, B is bacterial density, P<sub>0</sub> is number of free phage at time 0, and P<sub>t</sub> is number of free phage at time t.

<sup>b</sup> Slope stands for the slope of linear regression of ln(P<sub>0</sub>/P<sub>t</sub>) vs t.

<sup>c</sup> R<sup>2</sup> is the R-squared value of the linear regression of ln(P<sub>0</sub>/P<sub>t</sub>) vs t.

Table S2. Sequences of hosts for isolation of polyvalent phages PX series

| <b>Phage</b> | <b>Host 1</b>               | <b>Host 2</b>       | <b>Host 3</b>               | <b>Host 4</b>               |
|--------------|-----------------------------|---------------------|-----------------------------|-----------------------------|
| PX1          | <i>P. aeruginosa</i> PA01   | <i>P. sp.</i> CF600 | <i>P. putida</i> F1         | <i>P. syringae</i> van Hall |
| PX2          | <i>P. putida</i> F1         | <i>P. sp.</i> CF600 | <i>P. aeruginosa</i> PA01   | <i>P. syringae</i> van Hall |
| PX3          | <i>P. sp.</i> CF600         | <i>P. putida</i> F1 | <i>P. syringae</i> van Hall | <i>P. aeruginosa</i> PA01   |
| PX4          | <i>P. syringae</i> van Hall | <i>P. putida</i> F1 | <i>P. aeruginosa</i> PA01   | <i>P. sp.</i> CF600         |
